# Supplementary material for: Clinical Characteristics, Complications and Outcomes of Patients with Severe Acute Respiratory Distress Syndrome Related to COVID-19 or Influenza Requiring Extracorporeal Membrane Oxygenation—A Retrospective Cohort Study
Source: MDPI journal article supplement (doi:10.3390/jcm10225440), 2021-11-21
Supplement: s1 [file s1]

**Supplementary Tables:**

- **Supplementary Table 1** – Pre-existing comorbidities stratified according presence of influenza and COVID-19
- **Supplementary Table 1** - Biomarkers stratified according presence of influenza and COVID-19

**Supplementary Table S1** – Pre-existing comorbidities stratified according presence of influenza and COVID-19

| <i>Parameters</i>                        | <i>All<br/>(n = 113)</i> | <i>Influenza<br/>(n = 61)</i> | <i>COVID-19<br/>(n = 52)</i> | <i>p-value</i> |
|------------------------------------------|--------------------------|-------------------------------|------------------------------|----------------|
| <b>AIDS n (%)</b>                        | 1 (1)                    | 1 (2)                         | 0 (0)                        | 0.354          |
| <b>Cerebral arterial disease n (%)</b>   | 6 (5)                    | 2 (3)                         | 4 (8)                        | 0.297          |
| <b>Chronic lung disease n (%)</b>        | 49 (43)                  | 29 (48)                       | 20 (38)                      | 0.332          |
| <b>Chronic kidney disease n (%)</b>      | 10 (9)                   | 9 (15)                        | 1 (2)                        | <b>0.002</b>   |
| <b>Congestive heart disease n (%)</b>    | 1 (1)                    | 1 (2)                         | 0 (0)                        | 1.000          |
| <b>Connective tissue disease n (%)</b>   | 9 (8)                    | 3 (5)                         | 6 (12)                       | 0.195          |
| <b>Coronary heart disease n (%)</b>      | 8 (7)                    | 3 (5)                         | 5 (10)                       | 0.332          |
| <b>Dementia n (%)</b>                    | 0 (0)                    | 0 (0)                         | 0 (0)                        | 1.000          |
| <b>Diabetes Mellitus n (%)</b>           | 29 (26)                  | 9 (15)                        | 20 (38)                      | <b>0.004</b>   |
| <b>Liver cirrhosis n (%)</b>             | 5 (4)                    | 5 (8)                         | 5 (10)                       | <b>0.035</b>   |
| <b>Peripheral arterial disease n (%)</b> | 0 (0)                    | 0 (0)                         | 0 (0)                        | 1.000          |
| <b>Malignancy (Tumor) n (%)</b>          |                          |                               |                              |                |
| Solid tumor                              | 1 (1)                    | 1 (2)                         | 0 (0)                        | 0.354          |
| Leukemia                                 | 6 (5)                    | 3 (5)                         | 3 (6)                        | 0.841          |
| Lymphoma                                 | 4 (4)                    | 3 (5)                         | 1 (2)                        | 0.390          |
| Solid tumor with metastases              | 0 (0)                    | 0 (0)                         | 0 (0)                        | 1.000          |

**Abbreviations:** AIDS, acquired immune deficiency syndrome; n, number;

**Supplementary Table S2 – Biomarkers stratified according presence of influenza and COVID-19**

| <i>Variables</i>           | <i>All<br/>(n = 113)</i> | <i>Influenza<br/>(n = 61)</i> | <i>COVID-19<br/>(n = 52)</i> | <i>p-value</i> |
|----------------------------|--------------------------|-------------------------------|------------------------------|----------------|
| <b>Laboratory results</b>  |                          |                               |                              |                |
| Haemoglobin – before ECMO  | 9.8 (8.6 – 12.4)         | 10.3 (8.7 – 12.0)             | 9.7 (8.1 – 12.4)             | 0.374          |
| Haemoglobin – 24h ECMO     | 9.1 (8.0 – 10)           | 9.2 (8.3 – 10.3)              | 8.8 (7.8 – 9.9)              | 0.195          |
| Haemoglobin – d7 ECMO      | 9.4 (8.6 – 10)           | 9.6 (8.9 – 10.5)              | 8.9 (8.3 – 9.6)              | <b>0.005</b>   |
| Bilirubin – before ECMO    | 1.1 (0.7 – 1.8)          | 1.0 (0.7 – 1.5)               | 1.3 (0.7 – 1.9)              | 0.359          |
| Bilirubin – 24h ECMO       | 1.5 (1.0 – 2.2)          | 1.4 (0.9 – 2.4)               | 1.7 (1.1 – 2.2)              | 0.406          |
| Bilirubin – d7 ECMO        | 1.5 (0.9 – 5.2)          | 1.7 (1.0 – 5.2)               | 1.5 (0.8 – 4.4)              | 0.525          |
| Leukocytes – before ECMO   | 13.6 (8.4 – 19.0)        | 12.5 (8.0 – 18.7)             | 14.5 (10.5 – 19.7)           | 0.293          |
| Leukocytes – min ECMO      | 7.1 (4.6 – 10.1)         | 7.0 (4.3 – 8.7)               | 7.7 (5.1 – 11.8)             | 0.151          |
| Leukocytes – max ECMO      | 20.4 (15.5 – 27.7)       | 20.4 (15.5 – 29.1)            | 19.9 (15.4 – 26.4)           | 0.413          |
| Thrombocytes – before ECMO | 228 (144 – 338)          | 228 (144 – 338)               | 304 (203 – 386)              | <b>0.002</b>   |
| Thrombocytes – 24h ECMO    | 172 (107 – 268)          | 172 (107 – 268)               | 224 (150 – 279)              | <b>0.005</b>   |
| Thrombocytes – d7 ECMO     | 104 (75 – 167)           | 104 (75 – 167)                | 96 (80 – 137)                | 0.496          |
| Quick – before ECMO        | 93 (74 – 101)            | 93 (74 – 106)                 | 95 (80 – 107)                | 0.258          |
| Quick – 24h ECMO           | 79 (63 – 96)             | 79 (63 – 96)                  | 81 (66 – 100)                | 0.296          |
| Quick – d7 ECMO            | 83 (66 – 101)            | 83 (66 – 101)                 | 88 (66 – 102)                | 0.367          |
| INR – before ECMO          | 1.06 (1.0 – 1.2)         | 1.1 (1.0 – 1.2)               | 1.0 (1.0 – 1.1)              | 0.059          |
| INR – 24h ECMO             | 1.1 (1.02 – 1.26)        | 1.2 (1.0 – 1.3)               | 1.1 (1.0 – 1.2)              | 0.224          |
| INR – d7 ECMO              | 1.1 (1 – 1.2)            | 1.1 (1.0 – 1.2)               | 1.1 (1.0 – 1.2)              | 0.364          |
| Fibrinogen – before ECMO   | 5.3 (4.0 – 7.1)          | 5.3 (4.0 – 7.7)               | 5.3 (4.3 – 6.4)              | 0.603          |
| Fibrinogen – 24h ECMO      | 4.8 (3.7 – 5.7)          | 4.7 (4.0 – 6.5)               | 4.8 (3.7 – 5.4)              | 0.409          |
| Fibrinogen – d7 ECMO       | 4.0 (3.7 – 4.8)          | 4.0 (3.6 – 4.1)               | 4.1 (3.7 – 5.1)              | 0.483          |
| D-Dimere – before ECMO     | 4.5 (2.9 – 11.0)         | 6.5 (3.1 – 19.4)              | 4.2 (2.9 – 9.5)              | 0.375          |
| D-Dimere – 24h ECMO        | 7.0 (3.3 – 13.6)         | 8.7 (4.4 – 17.9)              | 5.5 (3.0 – 10.6)             | <b>0.027</b>   |
| D-Dimere – d7 ECMO         | 11.6 (6.8 – 23.8)        | 32.9 (14.2 – 34.0)            | 31.1 (14.7 – 35.2)           | 0.731          |
| Creatinine – before ECMO   | 1.4 (0.8 – 2.0)          | 1.4 (0.8 – 2.0)               | 1.2 (0.7 – 2.0)              | 0.310          |
| Creatinine – 24h ECMO      | 1.3 (0.8 – 2.1)          | 1.5 (1.0 – 2.2)               | 1.1 (0.7 – 1.8)              | <b>0.033</b>   |
| Creatinine – d7 ECMO       | 1.1 (0.7 – 1.8)          | 1.2 (0.7 – 2.1)               | 1.0 (0.8 – 1.5)              | 0.267          |
| AST – before ECMO          | 91 (45 – 152)            | 110 (44 – 207)                | 80 (51 – 120)                | 0.153          |
| AST – 24h ECMO             | 106 (54 – 229)           | 130 (62 – 215)                | 78 (42 – 237)                | 0.321          |
| AST – d7 ECMO              | 73 (50 – 159)            | 77 (49 – 150)                 | 71 (52 – 163)                | 0.961          |
| ALT – before ECMO          | 44 (30 – 72)             | 44 (29 – 72)                  | 45 (31 – 69)                 | 0.922          |
| ALT – 24h ECMO             | 47 (27 – 68)             | 47 (28 – 64)                  | 45 (25 – 73)                 | 0.990          |
| ALT – d7 ECMO              | 42 (28 – 82)             | 42 (28 – 88)                  | 43 (29 – 63)                 | 0.810          |
| gGT – before ECMO          | 110 (60 – 193)           | 92 (58 – 188)                 | 113 (51 – 192)               | 0.537          |
| gGT – 24h ECMO             | 85 (42 – 141)            | 72 (36 – 127)                 | 113 (70 – 204)               | 0.315          |
| gGT – d7 ECMO              | 175 (134 – 400)          | 206 (142 – 437)               | 116 (63 – 145)               | 0.437          |
| CRP – before ECMO          | 239 (142 – 295)          | 227 (105 – 273)               | 248 (164 – 300)              | 0.082          |
| CRP – 24h ECMO             | 215 (142 – 286)          | 208 (130 – 302)               | 221 (158 – 280)              | 0.824          |
| CRP – d7 ECMO              | 141 (73 – 223)           | 138 (75 – 213)                | 148 (69 – 230)               | 0.641          |
| LDH – before ECMO          | 558 (424 – 714)          | 613 (420 – 1085)              | 556 (449 – 637)              | 0.284          |
| LDH – 24h ECMO             | 596 (445 – 986)          | 631 (459 – 1079)              | 561 (419 – 862)              | 0.276          |
| LDH – d7 ECMO              | 552 (427 – 778)          | 567 (403 – 800)               | 536 (454 – 708)              | 0.910          |
| PCT – before ECMO          | 1.3 (0.6 – 4.4)          | 2.5 (0.8 – 11.5)              | 1.1 (0.4 – 3.0)              | <b>0.031</b>   |
| PCT – 24h ECMO             | 2.4 (0.7 – 8.4)          | 4.4 (1.2 – 25.5)              | 2.2 (0.6 – 5.1)              | <b>0.043</b>   |
| PCT – d7 ECMO              | 1.1 (0.5 – 3.2)          | 2.1 (0.9 – 5.3)               | 0.9 (0.4 – 2.6)              | 0.130          |

**Data are expressed as n (%) or median (interquartile range)**

**Abbreviations:** PCT, procalcitonin; CRP, c-reactive protein; INR, international normalized ratio; AST, aspartate amino transferase; ALT alanine aminotransferase; gGT, gamma glutamyl transferase; LDH, lactate dehydrogenase;
